# Supplementary material
Source: PubMed Central journal article supplement (PMC2577254)
Supplement: pp.108.118810_2.pdf [file pp.108.118810_2.pdf]

# Supplemental Figure 2

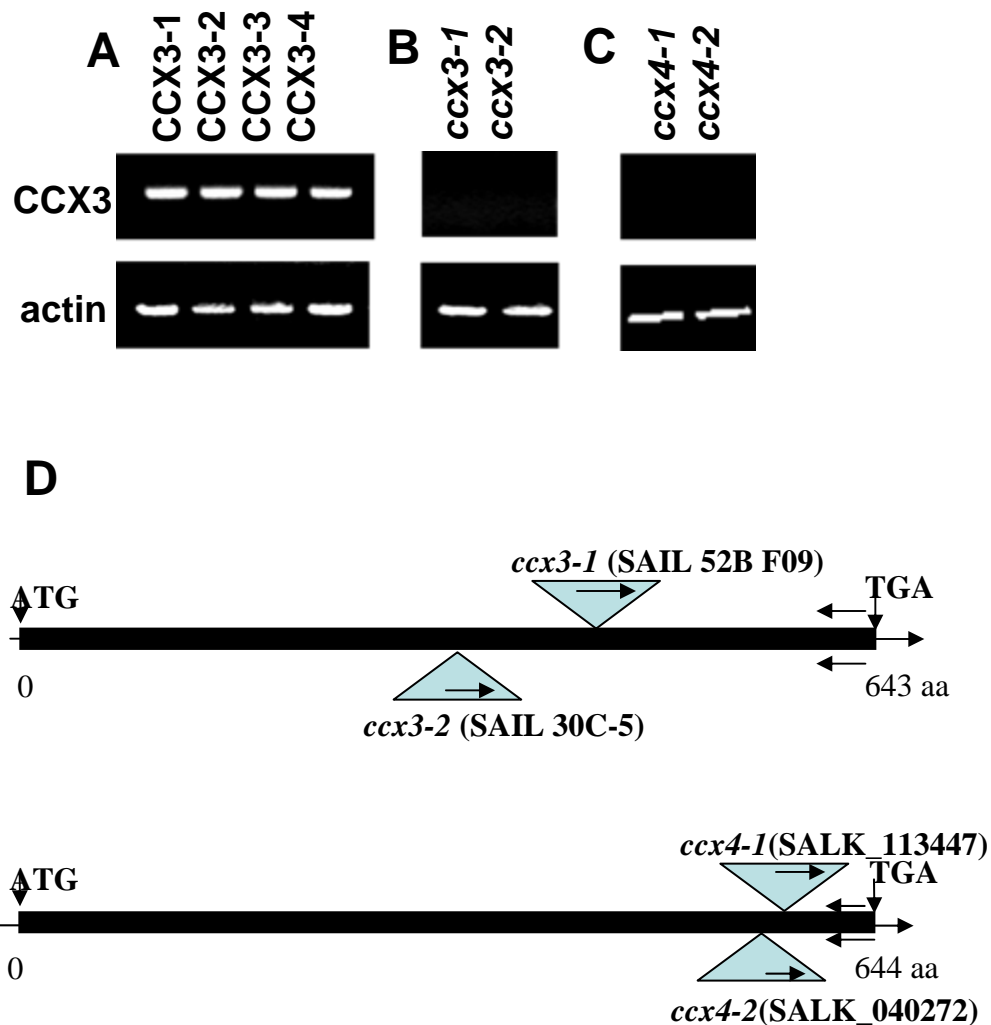

**Figure S2.** Altered expression of *AtCCX3* in Arabidopsis mutants. A to C, RT-PCR showing *AtCCX3* expression in 35S::*AtCCX3* lines (A), *ccx3* (B) and *ccx4* (C). D, Diagram of T-DNA insertions for *ccx3-1*, *ccx3-2*, *ccx4-1* and *ccx4-2*. Arrows indicate location of primers at the T-DNA border and the genomic ORF used to identify alleles.
