# Supplementary material
Source: PubMed Central journal article supplement (PMC2577254)
Supplement: pp.108.118810_4.pdf [file pp.108.118810_4.pdf]

# Supplemental Figure 1

A



# Supplemental Figure 1



**Figure S1.** A, Phylogenetic tree showing the relative distance of predicted CAX to CCX proteins, including *HsNCKX6* (Phylip package from the protest software program ; Felsenstein, 1989) Bar represents percent change in amino acids. B, Protein sequence comparison of *AtCCX3* and *AtCCX4* to *AtCAX1* and *HsNCKX6*. Alignment of deduced amino acid sequences were performed using ClustalW 1.8 program (Thompson *et al.*, 1994). The autoregulatory domain of CAX1 is underlined in red. The yellow boxes mark the highly conserved  $\alpha 1$  and  $\alpha 2$  domains that are absent from *AtCAX1*. C, Predicted topology of *HsNCKX6*, *AtCAX1*, *AtCCX4* (*At1g54115*) and *AtCCX3* (*At3g14070*) analysis done using TMHMM algorithm (Sonnhammer *et al.*, 1998; Krogh *et al.*, 2001); <http://www.cbs.dtu.dk/services/TMHMM/>)

## References:

Felsenstein F (1989) Mathematics vs. Evolution: Mathematical Evolutionary Theory. *Science* 246(4923): 941-942  
Krogh A, Larsson B, von Heijne G, Sonnhammer ELL (2001) Predicting transmembrane protein topology with a hidden Markov model: application to complete genomes. *J Mol Biol* 305: 567–580  
Sonnhammer ELL, Von Heijne G, Krogh A (1998) A hiddenMarkov model for redicting transmembrane helices in protein sequences. *Proceedings of the Sixth International Conference on Intelligent Systems for Molecular Biology* 6: 175–182.
